# Supplementary material for: Berbamine Reduces Chloroquine-Induced Itch in Mice through Inhibition of MrgprX1
Source: MDPI journal article supplement (doi:10.3390/ijms232214321), 2022-11-18
Supplement: s1 [file s1]

## **Supporting information**

### **Berbamine reduces chloroquine-induced itch in mice through inhibition of MrgprX1**

**Kunhi Ryu, Yunkyung Heo, Yechan Lee, Hyejin Jeon and Wan Namkung \***

<sup>1</sup>College of Pharmacy, Yonsei Institute of Pharmaceutical Sciences, Yonsei University, Incheon 21983, Korea.

Correspondence to: Wan Namkung, Ph.D. College of Pharmacy, Yonsei Institute of Pharmaceutical Sciences, Yonsei University, Incheon 21983, Korea; Tel: +82 32 749 4519; Fax: +82 32 749 4109; E-mail: wnamkung@yonsei.ac.kr

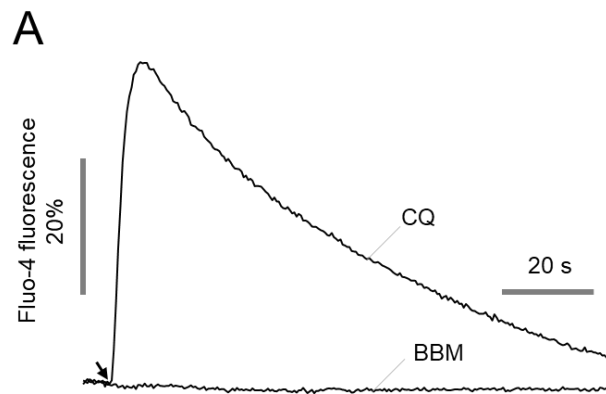

**Figure S1. Effect of berbamine on MrgprX1 activation.** (A) Intracellular calcium levels were measured using Fluo-4 NW in HEK293T cells expressing MrgprX1. The cells were treated with 30  $\mu$ M berbamine (BBM) or 1 mM of chloroquine (CQ).

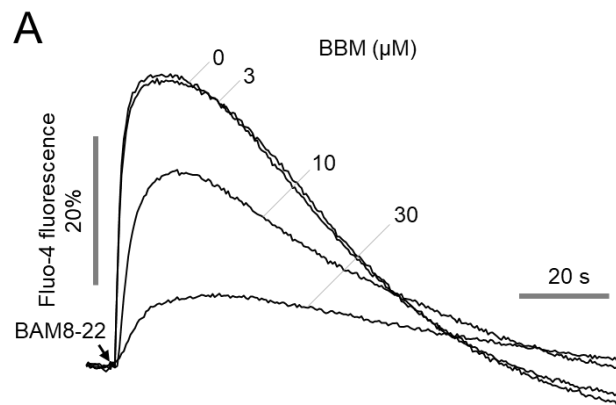

**Figure S2. Effect of berbamine on BAM8-22 induced MrgprX1 activation.** (A) Intracellular calcium levels were measured using Fluo-4 NW in HEK293T cells expressing MrgprX1. The cells were pretreated with indicated concentrations of berbamine (BBM) for 10 min prior to the treatment of 500 nM BAM8-22.

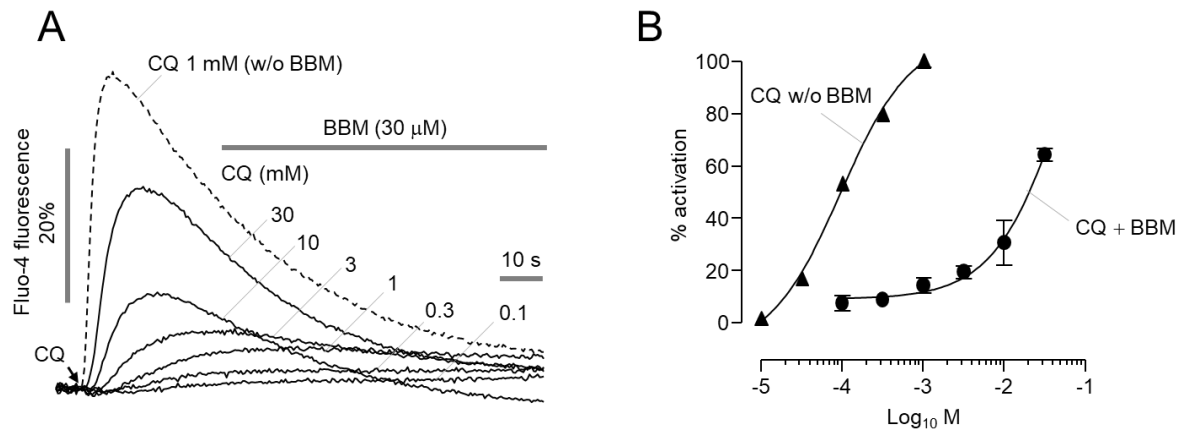

**Figure S3. Dose response of CQ-induced MrgprX1 activation in the presence or absence of berbamine.** **(A)** Intracellular calcium levels were measured using Fluo-4 NW in HEK293T cells expressing MrgprX1. The cells were pretreated with 30  $\mu$ M of berbamine (BBM) and applied with indicated concentrations of CQ. **(B)** Summary of dose-response (mean  $\pm$  S.E.,  $n = 4$ ). The dose response data of CQ in the absence of BBM was obtained from Figure 1B.
